# Supplementary material for: Vickermania gen. nov., trypanosomatids that use two joined flagella to resist midgut peristaltic flow within the fly host
Source: PubMed Central journal article supplement (PMC7712620; doi:10.1186/s12915-020-00916-y), 2020-12-02

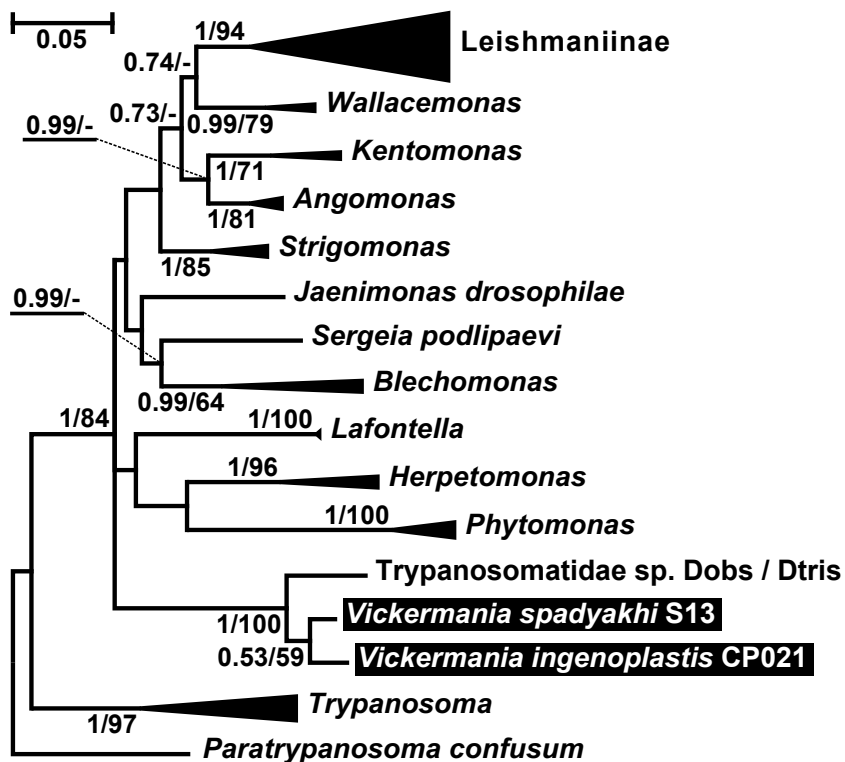

Supplement: 12915_2020_916_MOESM4_ESM.pdf [file 12915_2020_916_MOESM4_ESM.pdf]
